# Supplementary material for: Sex‐Specific Genetic Variants are Associated With Coronary Endothelial Dysfunction
Source: PubMed Central journal article supplement — J Am Heart Assoc. 2016 Apr 18;5(4):e002544. doi: 10.1161/JAHA.115.002544 (PMC4859270; doi:10.1161/jaha.115.002544), 2016-04-18
Supplement: JAH3-5-e002544-s001.pdf [file JAH3-5-e002544-s001.pdf]

**SUPPLEMENTAL MATERIAL**

**Table S1: Patient characteristics**

|                                    | All<br>n=643 |        | Premenopausal<br>n=178 |        | Postmenopausal<br>n=426 |        | Men<br>n=217 |        | P-value |
|------------------------------------|--------------|--------|------------------------|--------|-------------------------|--------|--------------|--------|---------|
| Age, years                         | 49.7         | (11.4) | 43.8                   | (9.1)  | 56.9                    | (8.6)  | 46.6         | (11.7) | <0.001  |
| Body Mass Index, kg/m <sup>2</sup> | 29.1         | (6.2)  | 29.1                   | (7.0)  | 29.1                    | (6.6)  | 28.9         | (4.7)  | 0.91    |
| % change CAd (Ach)                 | -15.1        | (21.2) | -12.0                  | (20.4) | -14.9                   | (20.1) | -17.9        | (22.7) | 0.022   |
| <b>Risk Factor</b>                 |              |        |                        |        |                         |        |              |        |         |
| Diabetes Mellitus                  | 52           | (8%)   | 12                     | (7%)   | 16                      | (7%)   | 24           | (11%)  | 0.16    |
| Hypertension                       | 264          | (41%)  | 52                     | (29%)  | 112                     | (46%)  | 98           | (45%)  | <0.001  |
| Dyslipidemia                       | 353          | (55%)  | 72                     | (41%)  | 145                     | (60%)  | 135          | (62%)  | <0.001  |
| Family History                     | 409          | (65%)  | 113                    | (65%)  | 156                     | (66%)  | 138          | (66%)  | 0.96    |
| LipoProtein A                      | 24.0         | (31.0) | 22.2                   | (28.2) | 25.1                    | (32.7) | 24.6         | (32.3) | 0.68    |
| hsCRP, mg/dL                       | 2.7          | (24.0) | 5.3                    | (43.5) | 1.9                     | (2.8)  | 1.4          | (3.5)  | 0.30    |
| Homocysteine, umol/L               | 8.0          | (4.4)  | 7.5                    | (4.7)  | 8.0                     | (5.3)  | 8.4          | (2.9)  | 0.19    |
| <b>Smoking</b>                     |              |        |                        |        |                         |        |              |        |         |
| Never                              | 326          | (51%)  | 98                     | (55%)  | 142                     | (59%)  | 84           | (39%)  | <0.001  |
| Former                             | 232          | (36%)  | 60                     | (34%)  | 84                      | (35%)  | 86           | (40%)  |         |
| Current                            | 83           | (13%)  | 20                     | (11%)  | 16                      | (7%)   | 46           | (21%)  |         |
| <b>Drugs</b>                       |              |        |                        |        |                         |        |              |        |         |
| Aspirin                            | 326          | (51%)  | 82                     | (46%)  | 123                     | (51%)  | 120          | (55%)  | 0.19    |
| Calcium Channel Blockers           | 239          | (37%)  | 60                     | (34%)  | 88                      | (36%)  | 89           | (41%)  | 0.30    |

|                                                                               |     |       |    |       |     |       |    |       |        |
|-------------------------------------------------------------------------------|-----|-------|----|-------|-----|-------|----|-------|--------|
| Angiotensin-converting enzyme – inhibitor/<br>Angiotensin II receptor blocker | 104 | (16%) | 28 | (16%) | 34  | (14%) | 42 | (19%) | 0.29   |
| Beta-blocker                                                                  | 186 | (29%) | 55 | (31%) | 71  | (29%) | 58 | (27%) | 0.65   |
| Diuretics                                                                     | 106 | (16%) | 29 | (16%) | 56  | (23%) | 21 | (10%) | <0.001 |
| Lipid-lowering drugs                                                          | 248 | (39%) | 53 | (30%) | 96  | (40%) | 97 | (45%) | 0.008  |
| Estrogen Replacement Therapy                                                  | 117 | (27%) | 9  | (5%)  | 108 | (44%) | -  | (-)   | <0.001 |

Values are given as n (%) or mean (standard deviation). P-value shows women vs. men.

**Table S2: SNPs associated with Macrovascular/ Epicardial Endothelial dysfunction significant only among Females**

| Chr. | Significant SNP in females |                  |                                | Risk Allele | Overall allele X frequency | OR Overall | P-value Overall | OR Men | P-value Men | OR Premeno | P-value Premeno | OR Postmeno | P-value Postmeno |
|------|----------------------------|------------------|--------------------------------|-------------|----------------------------|------------|-----------------|--------|-------------|------------|-----------------|-------------|------------------|
|      | SNP in                     | Position         | Gene region                    | X/Y         |                            |            |                 |        |             |            |                 |             |                  |
| 1    | rs12038000                 | 111859362        | <i>ADORA3</i>                  | A/G         | 0.61                       | 1.30       | 0.0357          | 0.93   | 0.7307      | 1.37       | 0.1832          | 1.73        | <b>0.0097</b>    |
| 1    | rs16851008                 | 201387919        | <i>ADORA1</i>                  | G/A         | 0.87                       | 1.33       | 0.1066          | 0.79   | 0.3910      | 2.48       | 0.0792          | 1.77        | 0.0424           |
| 1    | k1_20139534                | 201395343        | <i>ADORA1/</i>                 | A/G         | 0.87                       | 1.28       | 0.1549          | 0.73   | 0.2538      | 2.88       | 0.0619          | 1.74        | 0.05             |
| 1    | rs16851020                 | 201400275        | <i>MYBPH/</i><br><i>ADORA1</i> | C/A         | 0.87                       | 1.29       | 0.1502          | 0.70   | 0.2132      | 2.48       | 0.0792          | 1.77        | 0.0424           |
| 6    | <b>rs7767084</b>           | <b>160882493</b> | <i>LPA</i>                     | G/A         | 0.16                       | 1.32       | 0.0780          | 0.71   | 0.2483      | 2.35       | <b>0.0058</b>   | 1.48        | 0.1085           |
| 6    | rs9365171                  | 160901726        | <i>LPA</i>                     | A/C         | 0.35                       | 1.37       | 0.0118          | 0.99   | 0.9691      | 1.79       | 0.0213          | 1.61        | 0.0224           |
| 6    | rs3798221                  | 160918138        | <i>LPA</i>                     | T/G         | 0.19                       | 1.58       | 0.0023          | 0.80   | 0.4244      | 1.94       | 0.0115          | 2.21        | <b>0.0017</b>    |
| 6    | rs9364564                  | 160919030        | <i>LPA</i>                     | A/G         | 0.18                       | 1.50       | 0.0134          | 0.77   | 0.3854      | 1.94       | 0.0206          | 2.09        | <b>0.0077</b>    |
| 6    | rs7453899                  | 160930756        | <i>LPA</i>                     | T/A         | 0.35                       | 1.35       | 0.0167          | 1.00   | 1.0000      | 1.68       | 0.0357          | 1.58        | 0.0269           |
| 6    | rs35600881                 | 160946754        | <i>LPA</i>                     | A/G         | 0.23                       | 1.50       | 0.0046          | 0.95   | 0.8481      | 1.63       | 0.0521          | 2           | <b>0.0029</b>    |
| 6    | rs13202636                 | 160949718        | <i>LPA</i>                     | G/A         | 0.23                       | 1.49       | 0.0053          | 0.95   | 0.8481      | 1.62       | 0.057           | 1.99        | <b>0.0032</b>    |
| 6    | rs1321195                  | 161004146        | <i>LPA</i>                     | T/C         | 0.13                       | 1.48       | 0.0256          | 0.80   | 0.4877      | 1.82       | 0.0475          | 2.03        | 0.0148           |
| 7    | rs2237583                  | 94788113         | <i>PON1</i>                    | G/A         | 0.70                       | 1.15       | 0.3002          | 0.70   | 0.0898      | 1.33       | 0.3269          | 2.02        | <b>0.0034</b>    |
| 11   | rs757092                   | 2455754          | <i>KCNQ1</i>                   | A/G         | 0.64                       | 1.2        | 0.1337          | 1.05   | 0.8214      | 2.05       | <b>0.0058</b>   | 1.02        | 0.9126           |
| 11   | rs11022996                 | 2458902          | <i>KCNQ1</i>                   | A/G         | 0.61                       | 1.15       | 0.2288          | 1.17   | 0.3798      | 1.93       | <b>0.0068</b>   | 1.08        | 0.7061           |
| 11   | rs1080017                  | 2468376          | <i>KCNQ1</i>                   | G/A         | 0.64                       | 1.23       | 0.0935          | 1.03   | 0.8661      | 2.1        | <b>0.0046</b>   | 1.06        | 0.7654           |
| 11   | rs594942                   | 63762868         | <i>FKBP2</i>                   | T/C         | 0.35                       | 1.18       | 0.1757          | 1.02   | 0.9067      | 1.9        | <b>0.0093</b>   | 1.02        | 0.9413           |

**Table S3: SNPs associated with Macrovascular/ Epicardial Endothelial dysfunction significant only among Males**

| Chr. | Significant SNP in males | Position         | Gene region                   | Risk Allele X/Y | Overall allele X frequency | OR Overall | P-value Overall | OR Men | P-value Men   | OR Premeno | P-value Premeno | OR Postmeno | P-value Postmeno |
|------|--------------------------|------------------|-------------------------------|-----------------|----------------------------|------------|-----------------|--------|---------------|------------|-----------------|-------------|------------------|
| 1    | <b>rs17511046</b>        | <b>201376668</b> | <i>ADORA1</i>                 | G/A             | 0.93                       | 1.17       | 0.5066          | 3.88   | <b>0.0068</b> | 0.79       | 0.5397          | 0.55        | 0.132            |
| 4    | <b>rs3774933</b>         | <b>103645369</b> | <i>NFKB1</i>                  | G/A             | 0.39                       | 1.06       | 0.6362          | 1.72   | <b>0.0085</b> | 0.81       | 0.4177          | 0.78        | 0.2167           |
| 4    | <b>rs1599961</b>         | <b>103662599</b> | <i>NFKB1</i>                  | A/G             | 0.39                       | 1.06       | 0.6362          | 1.72   | <b>0.0085</b> | 0.81       | 0.4177          | 0.78        | 0.2167           |
| 6    | rs20456                  | 39432901         | <i>LOC100124373/<br/>KIF6</i> | C/T             | 0.43                       | 1.31       | 0.0283          | 1.70   | <b>0.0069</b> | 1.35       | 0.2205          | 0.98        | 0.7137           |
| 6    | k6_39474093              | 39474093         | <i>KIF6</i>                   | T/A             | 0.06                       | 1.95       | 0.0060          | 4.00   | <b>0.0047</b> | 1.35       | 0.5081          | 1.55        | 0.2736           |
